# Supplementary material for: Immune and stromal scoring system associated with tumor microenvironment and prognosis: a gene-based multi-cancer analysis
Source: Springer Nature journal article supplement (doi:10.1186/s12967-021-03002-1), 2021-08-03
Supplement: MOESM9 [file 19538084]

| <b>Datasets</b>                      | <b>N</b> | <b>Data Type</b>                               | <b>Histological Type</b>       | <b>Reference</b>                                                                            |
|--------------------------------------|----------|------------------------------------------------|--------------------------------|---------------------------------------------------------------------------------------------|
| TCGA LUAD                            | 501      | Bulk RNA-seq, WES & clinical information       | 501 LUAD                       | Cancer Genome Atlas Research Network et al. Nat Genet 2013;45(10):1113-1120. PMID: 24071849 |
| TCGA SKCM                            | 352      | Bulk RNA-seq, WES & clinical information       | 352 SKCM                       | Cancer Genome Atlas Research Network et al. Nat Genet 2013;45(10):1113-1120. PMID: 24071849 |
| TCGA HNSC                            | 514      | Bulk RNA-seq, WES & clinical information       | 514 HNSC                       | Cancer Genome Atlas Research Network et al. Nat Genet 2013;45(10):1113-1120. PMID: 24071849 |
| GSE11969                             | 149      | Bulk RNA-chip & clinical information           | 94 LUAD & 55 other NSCLC       | Takeuchi T et al. J Clin Oncol 2006 Apr 10;24(11):1679-88. PMID: 16549822                   |
| GSE68465                             | 442      | Bulk RNA-chip & clinical information           | 442 LUAD                       | Shedden K et al. Nat Med 2008 Aug;14(8):822-7. PMID: 18641660                               |
| GSE68571                             | 86       | Bulk RNA-chip & clinical information           | 86 LUAD                        | Beer DG et al. Nat Med 2002 Aug;8(8):816-24. PMID: 12118244                                 |
| GSE37745                             | 196      | Bulk RNA-chip & clinical information           | 106 LUAD & 90 other NSCLC      | Botling J et al. Clin Cancer Res 2013 Jan 1;19(1):194-204. PMID: 23032747                   |
| GSE50081                             | 172      | Bulk RNA-chip & clinical information           | 127 LUAD & 45 other NSCLC      | Der SD et al. J Thorac Oncol 2014 Jan;9(1):59-64. PMID: 24305008                            |
| GSE65904                             | 214      | Bulk RNA-chip & clinical information           | 214 melanoma                   | Jayawardana K et al. Int J Cancer 2015 Feb 15;136(4):863-74. PMID: 24975271                 |
| GSE9014                              | 111      | Bulk RNA-chip in tumor-associated stroma       | 111 breast cancer              | Finak G et al. Nat Med 2008 May;14(5):518-27. PMID: 18438415                                |
| Immunotherapy Data Set 1 (Chen etal) | 31       | Immune Profiling by IHC & clinical information | 31 melanoma                    | Chen P L et al. Cancer Discovery, 2016, 6(8):827-837. PMID: 27301722                        |
| Immunotherapy Data Set 2 (GSE91061)  | 65       | Bulk RNA-seq & clinical information            | 65 melanoma                    | Riaz N et al. Cell 2017 Nov 2;171(4):934-949.e16. PMID: 29033130                            |
| Immunotherapy Data Set 3 (GSE93157)  | 65       | NanoString nCounter & clinical information     | 35 NSCLC, 5 HNSC & 25 melanoma | Prat A et a. Cancer Res 2017 Jul 1;77(13):3540-3550. PMID: 28487385                         |

|                                        |    |                                                     |                            |                                                                                        |
|----------------------------------------|----|-----------------------------------------------------|----------------------------|----------------------------------------------------------------------------------------|
| Immunotherapy Data Set 4<br>(GSE67501) | 11 | NanoString<br>nCounter &<br>clinical<br>information | 11 renal cell<br>carcinoma | Ascierto ML et al. Cancer<br>Immunol Res 2016 Sep<br>2;4(9):726-33. PMID:<br>27491898  |
| Immunotherapy Data Set 5<br>(GSE35640) | 56 | Bulk RNA-chip &<br>clinical<br>information          | 56 melanoma                | Ulloa-Montoya F et al. J Clin<br>Oncol 2013 Jul<br>1;31(19):2388-95. PMID:<br>23715562 |

---

**Supplementary table1** The basic information of included 15 datasets. LUAD, lung adenocarcinoma; SKCM, skin cutaneous melanoma; HNSC, head and neck squamous cell carcinoma; NSCLC, non-small cell lung cancer.
