# Supplementary material for: Immune and stromal scoring system associated with tumor microenvironment and prognosis: a gene-based multi-cancer analysis
Source: Springer Nature journal article supplement (doi:10.1186/s12967-021-03002-1), 2021-08-03
Supplement: MOESM10 [file 19538084]

| Datasets                                    | Sample details                                                                                                                   | Therapy                | Biopsy time point                                                                                                                                               | Clinical response                                             |
|---------------------------------------------|----------------------------------------------------------------------------------------------------------------------------------|------------------------|-----------------------------------------------------------------------------------------------------------------------------------------------------------------|---------------------------------------------------------------|
| Immunotherapy<br>Data Set 1<br>(Chen et al) | 16 pre-anti-CTLA4 therapy cases, 5 on-anti-CTLA4 therapy cases, 15 pre-anti-PD-1 therapy cases and 10 on-anti-PD-1 therapy cases | anti-CTLA4 & anti-PD-1 | 4.4 months before therapy, 3.2 months on anti-CTLA4 therapy, 3 months before anti-PD-1 therapy, 1.4 months on anti-PD-1 therapy, and 4.4 months after restaging | ≅ SD by RECIST (Response Evaluation Criteria in Solid Tumors) |
| Immunotherapy<br>Data Set 2<br>(GSE91061)   | 51 pre-treatment cases and 57 on-treatment cases                                                                                 | anti-PD-1              | 1-7 days before therapy and 23-29 days on cycle 1 therapy                                                                                                       | ≅ SD by RECIST v1.1                                           |
| Immunotherapy<br>Data Set 3<br>(GSE93157)   | 65 pre-treatment cases                                                                                                           | anti-PD-1              | none                                                                                                                                                            | ≅ SD by modified RECIST 1.1                                   |
| Immunotherapy<br>Data Set 4<br>(GSE67501)   | 11 pre-treatment cases                                                                                                           | anti-PD-1              | 2-81 months before therapy                                                                                                                                      | ≅ SD by RECIST                                                |
| Immunotherapy<br>Data Set 5<br>(GSE35640)   | 56 pre-treatment cases                                                                                                           | anti-MAGE-A3           | none                                                                                                                                                            | ≅ SD by RECIST v1.0                                           |

**Supplementary table2** The details of the 5 immunotherapy Cohorts.
