# Supplementary material for: Immune and stromal scoring system associated with tumor microenvironment and prognosis: a gene-based multi-cancer analysis
Source: Springer Nature journal article supplement (doi:10.1186/s12967-021-03002-1), 2021-08-03
Supplement: MOESM11 [file 19538084]

| ID             | Description                                                                                                               | Gene Ratio | BgR atio      | pval ue      | p.ad just    | qual ue      |
|----------------|---------------------------------------------------------------------------------------------------------------------------|------------|---------------|--------------|--------------|--------------|
| GO:00<br>06959 | humoral immune response                                                                                                   | 19/92      | 349/1<br>8493 | 6.99<br>E-15 | 1.38<br>E-11 | 1.05<br>E-11 |
| GO:00<br>02697 | regulation of immune effector process                                                                                     | 19/92      | 439/1<br>8493 | 4.30<br>E-13 | 4.24<br>E-10 | 3.23<br>E-10 |
| GO:00<br>42110 | T cell activation                                                                                                         | 19/92      | 451/1<br>8493 | 6.93<br>E-13 | 4.55<br>E-10 | 3.47<br>E-10 |
| GO:00<br>46651 | lymphocyte proliferation                                                                                                  | 15/92      | 264/1<br>8493 | 3.44<br>E-12 | 1.51<br>E-09 | 1.15<br>E-09 |
| GO:00<br>32943 | mononuclear cell proliferation                                                                                            | 15/92      | 266/1<br>8493 | 3.83<br>E-12 | 1.51<br>E-09 | 1.15<br>E-09 |
| GO:00<br>70661 | leukocyte proliferation                                                                                                   | 15/92      | 283/1<br>8493 | 9.31<br>E-12 | 3.06<br>E-09 | 2.33<br>E-09 |
| GO:00<br>34341 | response to interferon-gamma                                                                                              | 13/92      | 198/1<br>8493 | 1.74<br>E-11 | 4.82<br>E-09 | 3.67<br>E-09 |
| GO:00<br>02460 | adaptive immune response based on somatic recombination of immune receptors built from immunoglobulin superfamily domains | 16/92      | 354/1<br>8493 | 1.95<br>E-11 | 4.82<br>E-09 | 3.67<br>E-09 |
| GO:00<br>50863 | regulation of T cell activation                                                                                           | 15/92      | 305/1<br>8493 | 2.70<br>E-11 | 5.70<br>E-09 | 4.34<br>E-09 |
| GO:00<br>02478 | antigen processing and presentation of exogenous peptide antigen                                                          | 11/92      | 126/1<br>8493 | 3.18<br>E-11 | 5.70<br>E-09 | 4.34<br>E-09 |
| GO:00<br>02920 | regulation of humoral immune response                                                                                     | 11/92      | 126/1<br>8493 | 3.18<br>E-11 | 5.70<br>E-09 | 4.34<br>E-09 |
| GO:00<br>19886 | antigen processing and presentation of exogenous peptide antigen via MHC class II                                         | 10/92      | 98/18<br>493  | 5.50<br>E-11 | 9.02<br>E-09 | 6.87<br>E-09 |
| GO:00<br>19884 | antigen processing and presentation of exogenous antigen                                                                  | 11/92      | 134/1<br>8493 | 6.23<br>E-11 | 9.02<br>E-09 | 6.87<br>E-09 |
| GO:00<br>19882 | antigen processing and presentation                                                                                       | 12/92      | 175/1<br>8493 | 6.64<br>E-11 | 9.02<br>E-09 | 6.87<br>E-09 |
| GO:00<br>02495 | antigen processing and presentation of peptide antigen via MHC class II                                                   | 10/92      | 101/1<br>8493 | 7.46<br>E-11 | 9.02<br>E-09 | 6.87<br>E-09 |
| GO:00<br>42098 | T cell proliferation                                                                                                      | 12/92      | 178/1<br>8493 | 8.10<br>E-11 | 9.02<br>E-09 | 6.87<br>E-09 |
| GO:00<br>71346 | cellular response to interferon-gamma                                                                                     | 12/92      | 178/1<br>8493 | 8.10<br>E-11 | 9.02<br>E-09 | 6.87<br>E-09 |
| GO:00<br>02504 | antigen processing and presentation of peptide or polysaccharide antigen via MHC class II                                 | 10/92      | 102/1<br>8493 | 8.23<br>E-11 | 9.02<br>E-09 | 6.87<br>E-09 |
| GO:00<br>48002 | antigen processing and presentation of peptide antigen                                                                    | 11/92      | 139/1<br>8493 | 9.28<br>E-11 | 9.63<br>E-09 | 7.33<br>E-09 |
| GO:00<br>42129 | regulation of T cell proliferation                                                                                        | 11/92      | 153/1<br>8493 | 2.62<br>E-10 | 2.58<br>E-08 | 1.96<br>E-08 |

**Supplementary table3** The top 20 enrichment terms of the exemplar genes in immune cluster by NMF.
