# Supplementary material for: Immune and stromal scoring system associated with tumor microenvironment and prognosis: a gene-based multi-cancer analysis
Source: Springer Nature journal article supplement (doi:10.1186/s12967-021-03002-1), 2021-08-03
Supplement: MOESM12 [file 19538084]

| ID         | Description                                                              | GeneRatio | BgRatio | pvalue   | p.adjust | qvalue   |
|------------|--------------------------------------------------------------------------|-----------|---------|----------|----------|----------|
| GO:0030198 | extracellular matrix organization                                        | 51/90     | 348/184 | 5.76E-93 | 9.84E-62 | 7.30E-62 |
| GO:0043062 | extracellular structure organization                                     | 51/90     | 402/184 | 1.38E-93 | 1.18E-58 | 8.77E-59 |
| GO:0030199 | collagen fibril organization                                             | 19/90     | 52/1849 | 1.01E-3  | 5.74E-31 | 4.26E-29 |
| GO:0061448 | connective tissue development                                            | 20/90     | 263/184 | 1.16E-93 | 4.96E-18 | 3.68E-16 |
| GO:0051216 | cartilage development                                                    | 17/90     | 206/184 | 1.47E-93 | 5.02E-16 | 3.73E-14 |
| GO:0048705 | skeletal system morphogenesis                                            | 17/90     | 236/184 | 1.45E-93 | 4.12E-15 | 3.06E-13 |
| GO:0031589 | cell-substrate adhesion                                                  | 19/90     | 338/184 | 2.53E-93 | 6.17E-15 | 4.58E-13 |
| GO:0035987 | endodermal cell differentiation                                          | 10/90     | 45/1849 | 1.24E-3  | 2.64E-14 | 1.96E-12 |
| GO:0002062 | chondrocyte differentiation                                              | 13/90     | 117/184 | 1.44E-93 | 2.72E-14 | 2.02E-12 |
| GO:0001706 | endoderm formation                                                       | 10/90     | 50/1849 | 3.90E-3  | 6.66E-14 | 4.94E-12 |
| GO:0001503 | ossification                                                             | 18/90     | 380/184 | 2.81E-93 | 4.36E-13 | 3.24E-11 |
| GO:0002063 | chondrocyte development                                                  | 9/90      | 45/1849 | 7.80E-3  | 1.11E-13 | 8.23E-11 |
| GO:0060348 | bone development                                                         | 14/90     | 208/184 | 1.42E-93 | 1.87E-12 | 1.39E-10 |
| GO:0007492 | endoderm development                                                     | 10/90     | 74/1849 | 2.48E-3  | 3.03E-12 | 2.25E-10 |
| GO:0007178 | transmembrane receptor protein serine/threonine kinase signaling pathway | 16/90     | 340/184 | 7.51E-93 | 8.55E-12 | 6.34E-10 |
| GO:0001704 | formation of primary germ layer                                          | 11/90     | 118/184 | 1.21E-93 | 1.29E-11 | 9.57E-09 |
| GO:0071559 | response to transforming growth factor beta                              | 14/90     | 249/184 | 1.63E-93 | 1.63E-11 | 1.21E-09 |
| GO:0071560 | cellular response to transforming growth factor beta stimulus            | 13/90     | 242/184 | 1.61E-93 | 1.53E-10 | 1.13E-08 |
| GO:0010810 | regulation of cell-substrate adhesion                                    | 12/90     | 209/184 | 4.00E-93 | 3.60E-10 | 2.67E-08 |
| GO:0007160 | cell-matrix adhesion                                                     | 12/90     | 222/184 | 8.00E-93 | 6.83E-10 | 5.06E-08 |

**Supplementary table4** The top 20 enrichment terms of the exemplar genes in stromal cluster by NMF.
