# Supplementary material for: Immune and stromal scoring system associated with tumor microenvironment and prognosis: a gene-based multi-cancer analysis
Source: Springer Nature journal article supplement (doi:10.1186/s12967-021-03002-1), 2021-08-03
Supplement: MOESM13 [file 19538084]

| Cluster | ID            | Description                                           | Gene Ratio | BgR Ratio         | pvalue       | p.adjust       | qvalue         |
|---------|---------------|-------------------------------------------------------|------------|-------------------|--------------|----------------|----------------|
| 1       | GO:0<br>03019 | negative regulation of blood coagulation              | 5/87       | 52/1<br>8493      | 4.48E<br>-06 | 0.002<br>93928 | 0.002<br>60450 |
| 1       | GO:1<br>90004 | negative regulation of hemostasis                     | 5/87       | 52/1<br>8493      | 4.48E<br>-06 | 0.002<br>93928 | 0.002<br>60450 |
| 1       | GO:0<br>05081 | negative regulation of coagulation                    | 5/87       | 56/1<br>8493      | 6.49E<br>-06 | 0.002<br>93928 | 0.002<br>60450 |
| 1       | GO:0<br>06104 | negative regulation of wound healing                  | 5/87       | 72/1<br>8493      | 2.24E<br>-05 | 0.004<br>94421 | 0.004<br>38106 |
| 1       | GO:0<br>03019 | regulation of blood coagulation                       | 5/87       | 77/1<br>8493      | 3.11E<br>-05 | 0.004<br>94421 | 0.004<br>38106 |
| 1       | GO:1<br>90004 | regulation of hemostasis                              | 5/87       | 77/1<br>8493      | 3.11E<br>-05 | 0.004<br>94421 | 0.004<br>38106 |
| 1       | GO:0<br>00300 | regionalization                                       | 9/87       | 341/<br>1849<br>3 | 3.21E<br>-05 | 0.004<br>94421 | 0.004<br>38106 |
| 1       | GO:0<br>06104 | regulation of wound healing                           | 6/87       | 134/<br>1849<br>3 | 4.04E<br>-05 | 0.004<br>94421 | 0.004<br>38106 |
| 1       | GO:0<br>00758 | digestion                                             | 6/87       | 135/<br>1849<br>3 | 4.21E<br>-05 | 0.004<br>94421 | 0.004<br>38106 |
| 1       | GO:0<br>05081 | regulation of coagulation                             | 5/87       | 82/1<br>8493      | 4.21E<br>-05 | 0.004<br>94421 | 0.004<br>38106 |
| 1       | GO:0<br>03411 | positive regulation of heterotypic cell-cell adhesion | 3/87       | 15/1<br>8493      | 4.39E<br>-05 | 0.004<br>94421 | 0.004<br>38106 |
| 1       | GO:0<br>01003 | response to metal ion                                 | 9/87       | 358/<br>1849<br>3 | 4.69E<br>-05 | 0.004<br>94421 | 0.004<br>38106 |
| 1       | GO:1<br>90303 | negative regulation of response to wounding           | 5/87       | 84/1<br>8493      | 4.73E<br>-05 | 0.004<br>94421 | 0.004<br>38106 |
| 1       | GO:0<br>00995 | anterior/posterior pattern specification              | 7/87       | 211/<br>1849<br>3 | 6.15E<br>-05 | 0.005<br>96925 | 0.005<br>28936 |
| 1       | GO:0<br>02260 | digestive system process                              | 5/87       | 97/1<br>8493      | 9.41E<br>-05 | 0.008<br>52684 | 0.007<br>55563 |

|   |                                                       |      |      |       |       |       |  |
|---|-------------------------------------------------------|------|------|-------|-------|-------|--|
|   | GO:1                                                  |      | 160/ | 0.000 | 0.008 | 0.007 |  |
| 1 | 90303 regulation of response to wounding              | 6/87 | 1849 | 10817 | 64966 | 66447 |  |
|   | 4                                                     |      | 3    | 8     | 3     | 1     |  |
|   | GO:0                                                  |      |      |       | 0.008 | 0.007 |  |
| 1 | 03027 maintenance of gastrointestinal epithelium      | 3/87 | 20/1 | 0.000 | 64966 | 66447 |  |
|   | 7                                                     |      | 8493 | 1082  | 3     | 1     |  |
|   | GO:0                                                  |      |      | 0.000 | 0.014 | 0.012 |  |
| 1 | 03163 plasminogen activation                          | 3/87 | 24/1 | 18950 | 30779 | 67814 |  |
|   | 9                                                     |      | 8493 | 7     | 4     | 3     |  |
|   | GO:0                                                  |      | 434/ | 0.000 | 0.014 | 0.012 |  |
| 1 | 00738 pattern specification process                   | 9/87 | 1849 | 20215 | 45968 | 81273 |  |
|   | 9                                                     |      | 3    | 9     | 9     | 7     |  |
|   | GO:0                                                  |      |      | 0.000 | 0.014 | 0.012 |  |
| 1 | 03411 regulation of heterotypic cell-cell adhesion    | 3/87 | 25/1 | 21461 | 58330 | 92227 |  |
|   | 4                                                     |      | 8493 | 8     | 9     | 7     |  |
|   | GO:0                                                  |      | 152/ | 3.26E | 7.04E | 5.65E |  |
| 2 | 03016 platelet activation                             | 9/85 | 1849 | -08   | -05   | -05   |  |
|   | 8                                                     |      | 3    |       |       |       |  |
|   | GO:0                                                  |      | 287/ | 7.78E | 0.000 | 0.000 |  |
| 2 | 03433 cell junction organization                      | 10/8 | 1849 | -07   | 79027 | 63440 |  |
|   | 0                                                     |      | 5    | 3     | 1     | 7     |  |
|   | GO:0                                                  |      | 76/1 | 1.33E | 0.000 | 0.000 |  |
| 2 | 03410 homotypic cell-cell adhesion                    | 6/85 | 8493 | -06   | 79027 | 63440 |  |
|   | 9                                                     |      |      |       | 1     | 7     |  |
|   | GO:0                                                  |      | 238/ | 1.47E | 0.000 | 0.000 |  |
| 2 | 03432 cell junction assembly                          | 9/85 | 1849 | -06   | 79027 | 63440 |  |
|   | 9                                                     |      | 3    |       | 1     | 7     |  |
|   | GO:0                                                  |      | 493/ | 2.54E | 0.001 | 0.000 |  |
| 2 | 05087 regulation of body fluid levels                 | 12/8 | 1849 | -06   | 09430 | 87847 |  |
|   | 8                                                     |      | 5    | 3     | 2     | 5     |  |
|   | GO:0                                                  |      | 95/1 | 4.94E | 0.001 | 0.001 |  |
| 2 | 00704 cell-substrate junction assembly                | 6/85 | 8493 | -06   | 77666 | 42625 |  |
|   | 4                                                     |      |      |       | 6     | 8     |  |
|   | GO:0                                                  |      | 57/1 | 6.32E | 0.001 | 0.001 |  |
| 2 | 07052 platelet aggregation                            | 5/85 | 8493 | -06   | 94751 | 56340 |  |
|   | 7                                                     |      |      |       | 2     | 8     |  |
|   | GO:0                                                  |      | 36/1 | 2.19E | 0.005 | 0.004 |  |
| 2 | 04507 positive regulation of viral genome replication | 4/85 | 8493 | -05   | 10618 | 09910 |  |
|   | 0                                                     |      |      |       | 5     | 2     |  |
|   | GO:0                                                  |      | 334/ | 2.26E | 0.005 | 0.004 |  |
| 2 | 00759 blood coagulation                               | 9/85 | 1849 | -05   | 10618 | 09910 |  |
|   | 6                                                     |      | 3    |       | 5     | 2     |  |
|   | GO:0                                                  |      | 339/ | 2.54E | 0.005 | 0.004 |  |
| 2 | 00759 hemostasis                                      | 9/85 | 1849 | -05   | 10618 | 09910 |  |
|   | 9                                                     |      | 3    |       | 5     | 2     |  |
|   | GO:0                                                  |      | 340/ | 2.60E | 0.005 | 0.004 |  |
| 2 | 05081 coagulation                                     | 9/85 | 1849 | -05   | 10618 | 09910 |  |
|   | 7                                                     |      | 3    |       | 5     | 2     |  |

|      |       |                                                                       |      |              |                |       |       |       |
|------|-------|-----------------------------------------------------------------------|------|--------------|----------------|-------|-------|-------|
| GO:0 |       |                                                                       |      |              |                |       | 0.006 | 0.005 |
| 2    | 05077 | positive regulation of axonogenesis                                   | 5/85 | 81/1<br>8493 | 3.55E<br>-05   | 37647 | 11885 |       |
|      | 2     |                                                                       |      |              |                | 1     | 2     |       |
| GO:0 |       |                                                                       |      |              |                |       | 0.006 | 0.005 |
| 2    | 05165 | spindle localization                                                  | 4/85 | 42/1<br>8493 | 4.07E<br>-05   | 75653 | 42395 |       |
|      | 3     |                                                                       |      |              |                | 4     | 5     |       |
| GO:0 |       |                                                                       |      |              |                |       | 0.007 | 0.005 |
| 2    | 04852 | positive regulation of viral process                                  | 5/85 | 86/1<br>8493 | 4.74E<br>-05   | 29672 | 85760 |       |
|      | 4     |                                                                       |      |              |                | 1     | 2     |       |
| GO:0 |       |                                                                       |      |              |                |       | 0.008 | 0.006 |
| 2    | 01077 | positive regulation of cell morphogenesis involved in differentiation | 6/85 | 147/<br>1849 | 5.94E<br>-05   | 54537 | 85998 |       |
|      | 0     |                                                                       |      |              |                | 3     | 4     | 6     |
| GO:0 |       |                                                                       |      |              |                |       | 0.008 | 0.006 |
| 2    | 00176 | neuron migration                                                      | 6/85 | 149/<br>1849 | 6.41E<br>-05   | 63682 | 93339 |       |
|      | 4     |                                                                       |      |              |                | 3     | 4     | 9     |
| GO:0 |       |                                                                       |      |              |                |       | 0.010 | 0.008 |
| 2    | 06156 | axon development                                                      | 10/8 | 493/<br>1849 | 8.65E<br>-05   | 97253 | 80843 |       |
|      | 4     |                                                                       |      |              |                | 5     | 3     | 8     |
| GO:0 |       |                                                                       |      |              |                |       | 0.010 | 0.008 |
| 2    | 00722 | integrin-mediated signaling pathway                                   | 5/85 | 99/1<br>8493 | 9.28E<br>-05   | 97486 | 81031 |       |
|      | 9     |                                                                       |      |              |                | 5     | 3     |       |
| GO:0 |       |                                                                       |      |              |                |       | 0.010 | 0.008 |
| 2    | 00751 | muscle organ development                                              | 9/85 | 403/<br>1849 | 9.68E<br>-05   | 97486 | 81031 |       |
|      | 7     |                                                                       |      |              |                | 3     | 5     | 3     |
| GO:0 |       |                                                                       |      |              |                |       | 0.010 | 0.008 |
| 2    | 04390 | positive regulation of multi-organism process                         | 6/85 | 162/<br>1849 | 0.000<br>10176 | 97486 | 81031 |       |
|      | 2     |                                                                       |      |              |                | 3     | 5     | 3     |
| GO:0 |       |                                                                       |      |              |                |       | 1.82E | 1.55E |
| 3    | 00661 | SRP-dependent cotranslational protein targeting to membrane           | 50/9 | 105/<br>1849 | 1.01E<br>-91   | 1.82E | 1.55E | -88   |
|      | 4     |                                                                       |      |              |                | 5     | 3     | -88   |
| GO:0 |       |                                                                       |      |              |                |       | 1.10E | 9.38E |
| 3    | 00661 | cotranslational protein targeting to membrane                         | 50/9 | 109/<br>1849 | 1.22E<br>-90   | 1.10E | 9.38E | -88   |
|      | 3     |                                                                       |      |              |                | 5     | 3     | -88   |
| GO:0 |       |                                                                       |      |              |                |       | 1.29E | 1.10E |
| 3    | 00018 | nuclear-transcribed mRNA catabolic process, nonsense-mediated decay   | 51/9 | 120/<br>1849 | 2.15E<br>-90   | 1.29E | 1.10E | -87   |
|      | 4     |                                                                       |      |              |                | 5     | 3     | -87   |
| GO:0 |       |                                                                       |      |              |                |       | 5.66E | 4.81E |
| 3    | 04504 | protein targeting to ER                                               | 50/9 | 117/<br>1849 | 1.26E<br>-88   | 5.66E | 4.81E | -86   |
|      | 7     |                                                                       |      |              |                | 5     | 3     | -86   |
| GO:0 |       |                                                                       |      |              |                |       | 3.92E | 3.33E |
| 3    | 07259 | establishment of protein localization to endoplasmic reticulum        | 50/9 | 121/<br>1849 | 1.09E<br>-87   | 3.92E | 3.33E | -85   |
|      | 9     |                                                                       |      |              |                | 5     | 3     | -85   |
| GO:0 |       |                                                                       |      |              |                |       | 1.77E | 1.51E |
| 3    | 07097 | protein localization to endoplasmic reticulum                         | 51/9 | 146/<br>1849 | 5.90E<br>-85   | 1.77E | 1.51E | -82   |
|      | 2     |                                                                       |      |              |                | 5     | 3     | -82   |
| GO:0 |       |                                                                       |      |              |                |       | 1.03E | 8.77E |
| 3    | 00641 | translational initiation                                              | 54/9 | 194/<br>1849 | 4.01E<br>-84   | 1.03E | 8.77E | -82   |
|      | 3     |                                                                       |      |              |                | 5     | 3     | -82   |

|      |                                                         |      |          |       |       |       |
|------|---------------------------------------------------------|------|----------|-------|-------|-------|
| GO:0 |                                                         |      |          |       |       |       |
| 3    | 00095 nuclear-transcribed mRNA catabolic process        | 51/9 | 207/1849 | 6.96E | 1.57E | 1.33E |
| 6    |                                                         | 5    | 3        | -76   | -73   | -73   |
| GO:0 |                                                         |      |          |       |       |       |
| 3    | 00661 protein targeting to membrane                     | 50/9 | 198/1849 | 7.35E | 1.47E | 1.25E |
| 2    |                                                         | 5    | 3        | -75   | -72   | -72   |
| GO:0 |                                                         |      |          |       |       |       |
| 3    | 00640 mRNA catabolic process                            | 55/9 | 307/1849 | 4.66E | 8.40E | 7.14E |
| 2    |                                                         | 5    | 3        | -74   | -72   | -72   |
| GO:0 |                                                         |      |          |       |       |       |
| 3    | 00640 RNA catabolic process                             | 55/9 | 340/1849 | 2.02E | 3.32E | 2.82E |
| 1    |                                                         | 5    | 3        | -71   | -69   | -69   |
| GO:0 |                                                         |      |          |       |       |       |
| 3    | 09015 establishment of protein localization to membrane | 53/9 | 317/1849 | 2.59E | 3.88E | 3.30E |
| 0    |                                                         | 5    | 3        | -69   | -67   | -67   |
| GO:0 |                                                         |      |          |       |       |       |
| 3    | 00660 protein targeting                                 | 54/9 | 424/1849 | 5.41E | 7.50E | 6.38E |
| 5    |                                                         | 5    | 3        | -64   | -62   | -62   |
| GO:0 |                                                         |      |          |       |       |       |
| 3    | 04225 ribosome biogenesis                               | 26/9 | 282/1849 | 1.07E | 1.37E | 1.17E |
| 4    |                                                         | 5    | 3        | -25   | -23   | -23   |
| GO:0 |                                                         |      |          |       |       |       |
| 3    | 02261 ribonucleoprotein complex biogenesis              | 30/9 | 485/1849 | 1.47E | 1.76E | 1.50E |
| 3    |                                                         | 5    | 3        | -24   | -22   | -22   |
| GO:0 |                                                         |      |          |       |       |       |
| 3    | 00218 cytoplasmic translation                           | 18/9 | 93/1     | 6.07E | 6.84E | 5.81E |
| 1    |                                                         | 5    | 8493     | -24   | -22   | -22   |
| GO:0 |                                                         |      |          |       |       |       |
| 3    | 00636 rRNA processing                                   | 18/9 | 205/1849 | 1.58E | 1.68E | 1.42E |
| 4    |                                                         | 5    | 3        | -17   | -15   | -15   |
| GO:0 |                                                         |      |          |       |       |       |
| 3    | 01607 rRNA metabolic process                            | 18/9 | 240/1849 | 2.63E | 2.64E | 2.24E |
| 2    |                                                         | 5    | 3        | -16   | -14   | -14   |
| GO:0 |                                                         |      |          |       |       |       |
| 3    | 04227 ribosomal small subunit biogenesis                | 12/9 | 63/1     | 3.55E | 3.36E | 2.86E |
| 4    |                                                         | 5    | 8493     | -16   | -14   | -14   |
| GO:0 |                                                         |      |          |       |       |       |
| 3    | 04227 ribosomal large subunit biogenesis                | 12/9 | 73/1     | 2.34E | 2.11E | 1.80E |
| 3    |                                                         | 5    | 8493     | -15   | -13   | -13   |
| GO:0 |                                                         |      |          |       |       |       |
| 4    | 03508 axoneme assembly                                  | 8/42 | 61/1     | 9.41E | 2.23E | 1.95E |
| 2    |                                                         |      | 8493     | -13   | -10   | -10   |
| GO:0 |                                                         |      |          |       |       |       |
| 4    | 00334 cilium movement                                   | 8/42 | 63/1     | 1.23E | 2.23E | 1.95E |
| 1    |                                                         |      | 8493     | -12   | -10   | -10   |
| GO:0 |                                                         |      |          |       |       |       |
| 4    | 00701 microtubule-based movement                        | 11/4 | 269/1849 | 1.44E | 1.74E | 1.53E |
| 8    |                                                         | 2    | 3        | -11   | -09   | -09   |



|   |                                                  |      |      |       |       |       |
|---|--------------------------------------------------|------|------|-------|-------|-------|
|   | GO:0                                             |      | 255/ | 0.002 | 0.046 | 0.041 |
| 4 | 00728 germ cell development                      | 4/42 | 1849 | 61920 | 98483 | 12368 |
|   | 1                                                |      | 3    | 9     | 8     | 8     |
|   | GO:0                                             |      | 458/ |       |       |       |
| 7 | 00854 epidermis development                      | 16/9 | 1849 | 1.02E | 1.54E | 1.41E |
|   | 4                                                | 3    | 3    | -09   | -06   | -06   |
|   | GO:0                                             |      | 12/1 | 2.22E | 1.67E | 1.53E |
| 7 | 03158 hemidesmosome assembly                     | 5/93 | 8493 | -09   | -06   | -06   |
|   | 1                                                |      |      |       |       |       |
|   | GO:0                                             |      | 112/ | 9.34E | 4.69E | 4.30E |
| 7 | 07026 cornification                              | 8/93 | 1849 | -08   | -05   | -05   |
|   | 8                                                |      | 3    |       |       |       |
|   | GO:0                                             |      | 412/ | 1.42E | 5.37E | 4.92E |
| 7 | 04358 skin development                           | 13/9 | 1849 | -07   | -05   | -05   |
|   | 8                                                | 3    | 3    |       |       |       |
|   | GO:0                                             |      | 20/1 | 2.73E | 0.000 | 0.000 |
| 7 | 03027 maintenance of gastrointestinal epithelium | 4/93 | 8493 | -06   | 82284 | 75407 |
|   | 7                                                |      |      |       | 1     | 2     |
|   | GO:0                                             |      | 27/1 | 9.63E | 0.002 | 0.002 |
| 7 | 01066 epithelial structure maintenance           | 4/93 | 8493 | -06   | 41776 | 21570 |
|   | 9                                                |      |      |       | 8     | 3     |
|   | GO:0                                             |      | 61/1 | 1.37E | 0.002 | 0.002 |
| 7 | 01626 O-glycan processing                        | 5/93 | 8493 | -05   | 95895 | 71165 |
|   | 6                                                |      |      |       | 1     | 7     |
|   | GO:0                                             |      | 224/ | 1.72E | 0.003 | 0.002 |
| 7 | 03142 keratinization                             | 8/93 | 1849 | -05   | 24081 | 96996 |
|   | 4                                                | 3    | 3    |       | 4     | 3     |
|   | GO:0                                             |      | 113/ | 2.25E | 0.003 | 0.003 |
| 7 | 04230 molting cycle                              | 6/93 | 1849 | -05   | 39588 | 11207 |
|   | 3                                                | 3    | 3    |       | 4     | 4     |
|   | GO:0                                             |      | 113/ | 2.25E | 0.003 | 0.003 |
| 7 | 04263 hair cycle                                 | 6/93 | 1849 | -05   | 39588 | 11207 |
|   | 3                                                | 3    | 3    |       | 4     | 4     |
|   | GO:0                                             |      | 135/ | 6.13E | 0.007 | 0.007 |
| 7 | 00758 digestion                                  | 6/93 | 1849 | -05   | 92107 | 25907 |
|   | 6                                                | 3    | 3    |       | 6     | 2     |
|   | GO:0                                             |      | 348/ | 6.40E | 0.007 | 0.007 |
| 7 | 03019 extracellular matrix organization          | 9/93 | 1849 | -05   | 92107 | 25907 |
|   | 8                                                | 3    | 3    |       | 6     | 2     |
|   | GO:0                                             |      | 351/ | 6.83E | 0.007 | 0.007 |
| 7 | 00991 epidermal cell differentiation             | 9/93 | 1849 | -05   | 92107 | 25907 |
|   | 3                                                | 3    | 3    |       | 6     | 2     |
|   | GO:0                                             |      | 95/1 | 0.000 | 0.012 | 0.011 |
| 7 | 00704 cell-substrate junction assembly           | 5/93 | 8493 | 11702 | 41018 | 37300 |
|   | 4                                                |      |      | 3     | 6     | 6     |
|   | GO:0                                             |      | 97/1 | 0.000 | 0.012 | 0.011 |
| 7 | 02260 digestive system process                   | 5/93 | 8493 | 12913 | 41018 | 37300 |
|   | 0                                                |      |      | 8     | 6     | 6     |

|   |                                                                           |      |      |       |       |       |
|---|---------------------------------------------------------------------------|------|------|-------|-------|-------|
|   | GO:0                                                                      |      | 299/ | 0.000 | 0.012 | 0.011 |
| 7 | 03021 keratinocyte differentiation                                        | 8/93 | 1849 | 13176 | 41018 | 37300 |
|   | 6                                                                         |      | 3    |       | 6     | 6     |
|   | GO:0                                                                      |      | 102/ | 0.000 | 0.014 | 0.013 |
| 7 | 00649 protein O-linked glycosylation                                      | 5/93 | 1849 | 16364 | 50616 | 29381 |
|   | 3                                                                         |      | 3    |       | 4     | 3     |
|   | GO:0                                                                      |      | 402/ | 0.000 | 0.015 | 0.014 |
| 7 | 04306 extracellular structure organization                                | 9/93 | 1849 | 19046 | 72122 | 40732 |
|   | 2                                                                         |      | 3    | 3     |       | 1     |
|   | GO:0                                                                      |      | 238/ | 0.000 | 0.015 | 0.014 |
| 7 | 03432 cell junction assembly                                              | 7/93 | 1849 | 19821 | 72122 | 40732 |
|   | 9                                                                         |      | 3    |       |       | 1     |
|   | GO:0                                                                      |      | 26/1 | 0.000 | 0.021 | 0.020 |
| 7 | 06070 cell differentiation involved in embryonic placenta development     | 3/93 | 8493 | 29436 | 87457 | 04641 |
|   | 6                                                                         |      |      | 3     | 8     | 3     |
|   | GO:0                                                                      |      | 11/1 | 1.10E | 2.58E | 2.15E |
| 8 | 04312 surfactant homeostasis                                              | 5/90 | 8493 | -09   | -06   | -06   |
|   | 9                                                                         |      |      |       |       |       |
|   | GO:0                                                                      |      | 13/1 | 3.04E | 3.56E | 2.98E |
| 8 | 04887 chemical homeostasis within a tissue                                | 5/90 | 8493 | -09   | -06   | -06   |
|   | 5                                                                         |      |      |       |       |       |
|   | GO:0                                                                      |      | 221/ | 1.20E | 9.14E | 7.64E |
| 8 | 00189 tissue homeostasis                                                  | 10/9 | 1849 | -07   | -05   | -05   |
|   | 4                                                                         | 0    | 3    |       |       |       |
|   | GO:0                                                                      |      | 133/ | 2.74E | 9.14E | 7.64E |
| 8 | 03026 entry into host cell                                                | 8/90 | 1849 | -07   | -05   | -05   |
|   | 0                                                                         |      | 3    |       |       |       |
|   | GO:0                                                                      |      | 133/ | 2.74E | 9.14E | 7.64E |
| 8 | 04440 entry into host                                                     | 8/90 | 1849 | -07   | -05   | -05   |
|   | 9                                                                         |      | 3    |       |       |       |
|   | GO:0                                                                      |      | 133/ | 2.74E | 9.14E | 7.64E |
| 8 | 05180 entry into cell of other organism involved in symbiotic interaction | 8/90 | 1849 | -07   | -05   | -05   |
|   | 6                                                                         |      | 3    |       |       |       |
|   | GO:0                                                                      |      | 133/ | 2.74E | 9.14E | 7.64E |
| 8 | 05182 entry into other organism involved in symbiotic interaction         | 8/90 | 1849 | -07   | -05   | -05   |
|   | 8                                                                         |      | 3    |       |       |       |
|   | GO:0                                                                      |      | 289/ | 1.41E | 0.000 | 0.000 |
| 8 | 01905 viral life cycle                                                    | 10/9 | 1849 | -06   | 41332 | 34542 |
|   | 8                                                                         | 0    | 3    |       | 6     | 2     |
|   | GO:0                                                                      |      | 471/ | 2.93E | 0.000 | 0.000 |
| 8 | 04887 multicellular organismal homeostasis                                | 12/9 | 1849 | -06   | 76239 | 63714 |
|   | 1                                                                         | 0    | 3    |       | 4     | 4     |
|   | GO:0                                                                      |      | 425/ | 6.76E | 0.001 | 0.001 |
| 8 | 06024 anatomical structure homeostasis                                    | 11/9 | 1849 | -06   | 58203 | 32213 |
|   | 9                                                                         | 0    | 3    |       | 7     | 2     |
|   | GO:0                                                                      |      | 209/ | 8.16E | 0.001 | 0.001 |
| 8 | 05170 interaction with host                                               | 8/90 | 1849 | -06   | 73435 | 44942 |
|   | 1                                                                         |      | 3    |       | 4     | 5     |

|   |                                                                    |       |              |              |                |                |                |  |
|---|--------------------------------------------------------------------|-------|--------------|--------------|----------------|----------------|----------------|--|
| 8 | GO:1<br>90390 positive regulation of viral life cycle<br>2         | 5/90  | 60/1<br>8493 | 1.08E<br>-05 | 0.002<br>10360 | 0.001<br>75801 |                |  |
|   |                                                                    |       |              |              | 3              | 2              |                |  |
| 8 | GO:0<br>05090 leukocyte migration<br>0                             | 11/90 | 478/<br>1849 | 2.03E<br>-05 | 0.003<br>64707 | 0.003<br>04791 |                |  |
|   |                                                                    |       | 3            |              | 7              | 6              |                |  |
| 8 | GO:0<br>00166 response to hypoxia<br>6                             | 9/90  | 314/<br>1849 | 2.21E<br>-05 | 0.003<br>69690 | 0.003<br>08955 |                |  |
|   |                                                                    |       | 3            |              | 5              | 9              |                |  |
| 8 | GO:0<br>04306 extracellular structure organization<br>2            | 10/90 | 402/<br>1849 | 2.56E<br>-05 | 0.003<br>98946 | 0.003<br>33405 |                |  |
|   |                                                                    |       | 3            |              |                |                |                |  |
| 8 | GO:0<br>04671 viral entry into host cell<br>8                      | 6/90  | 121/<br>1849 | 2.75E<br>-05 | 0.003<br>98946 | 0.003<br>33405 |                |  |
|   |                                                                    |       | 3            |              |                |                |                |  |
| 8 | GO:0<br>03629 response to decreased oxygen levels<br>3             | 9/90  | 325/<br>1849 | 2.90E<br>-05 | 0.003<br>98946 | 0.003<br>33405 |                |  |
|   |                                                                    |       | 3            |              |                |                |                |  |
| 8 | GO:0<br>07048 response to oxygen levels<br>2                       | 9/90  | 349/<br>1849 | 5.05E<br>-05 | 0.006<br>55682 | 0.005<br>47963 |                |  |
|   |                                                                    |       | 3            |              | 3              | 4              |                |  |
| 8 | GO:0<br>04505 transcytosis<br>6                                    | 3/90  | 16/1<br>8493 | 5.96E<br>-05 | 0.007<br>28721 | 0.006<br>09003 |                |  |
|   |                                                                    |       |              |              | 7              | 5              |                |  |
| 8 | GO:0<br>04852 positive regulation of viral process<br>4            | 5/90  | 86/1<br>8493 | 6.23E<br>-05 | 0.007<br>28721 | 0.006<br>09003 |                |  |
|   |                                                                    |       |              |              | 7              | 5              |                |  |
| 9 | GO:0<br>01699 antibiotic metabolic process<br>9                    | 5/77  | 152/<br>1849 | 0.000        | 0.268<br>43106 | 0.252<br>63267 | 0.252<br>42305 |  |
|   |                                                                    |       | 3            |              | 3              | 4              | 4              |  |
| 9 | GO:0<br>01585 organic hydroxy compound transport<br>0              | 6/77  | 255/<br>1849 | 0.000        | 0.268<br>67815 | 0.252<br>63267 | 0.252<br>42305 |  |
|   |                                                                    |       | 3            |              | 7              | 4              | 4              |  |
| 9 | GO:0<br>04312 surfactant homeostasis<br>9                          | 2/77  | 11/1<br>8493 | 0.000        | 0.268<br>91855 | 0.252<br>63267 | 0.252<br>42305 |  |
|   |                                                                    |       |              |              | 5              | 4              | 4              |  |
| 9 | GO:0<br>04510 intermediate filament cytoskeleton organization<br>4 | 3/77  | 49/1<br>8493 | 0.001        | 0.268<br>63267 | 0.252<br>42305 | 0.252<br>42305 |  |
|   |                                                                    |       |              |              | 11419          | 4              | 4              |  |
| 9 | GO:0<br>04510 intermediate filament-based process<br>3             | 3/77  | 50/1<br>8493 | 0.001        | 0.268<br>18177 | 0.252<br>63267 | 0.252<br>42305 |  |
|   |                                                                    |       |              |              | 7              | 4              | 4              |  |
| 9 | GO:0<br>04887 chemical homeostasis within a tissue<br>5            | 2/77  | 13/1<br>8493 | 0.001        | 0.268<br>29566 | 0.252<br>63267 | 0.252<br>42305 |  |
|   |                                                                    |       |              |              | 2              | 4              | 4              |  |
| 9 | GO:0<br>00680 xenobiotic metabolic process<br>5                    | 4/77  | 117/<br>1849 | 0.001        | 0.268<br>44305 | 0.252<br>63267 | 0.252<br>42305 |  |
|   |                                                                    |       | 3            |              | 7              | 4              | 4              |  |



|    |                                           |      |              |                |       |       |       |       |
|----|-------------------------------------------|------|--------------|----------------|-------|-------|-------|-------|
|    | GO:0                                      |      |              |                |       |       | 0.268 | 0.252 |
| 9  | 00175 neural crest cell migration         | 3/77 | 55/1<br>8493 | 0.001<br>55842 | 63267 | 42305 |       |       |
|    | 5                                         |      |              |                | 4     | 4     |       |       |
|    | GO:0                                      |      |              |                |       |       | 0.001 | 0.301 |
| 9  | 04244 progesterone metabolic process      | 2/77 | 16/1<br>8493 | 97725          | 81585 | 60392 |       |       |
|    | 8                                         |      |              | 8              | 6     | 3     |       |       |
|    | GO:1                                      |      |              |                |       |       | 0.002 | 0.301 |
| 9  | 90264 tertiary alcohol metabolic process  | 2/77 | 17/1<br>8493 | 23485          | 81585 | 60392 |       |       |
|    | 4                                         |      |              | 9              | 6     | 3     |       |       |
|    | GO:0                                      |      |              |                |       |       | 0.002 | 0.301 |
| 9  | 00758 digestion                           | 4/77 | 135/<br>1849 | 43474          | 81585 | 60392 |       |       |
|    | 6                                         |      | 3            | 4              | 6     | 3     |       |       |
|    | GO:0                                      |      |              |                |       |       | 0.002 | 0.301 |
| 9  | 01890 ether metabolic process             | 2/77 | 19/1<br>8493 | 7949           | 81585 | 60392 |       |       |
|    | 4                                         |      |              |                | 6     | 3     |       |       |
|    | GO:0                                      |      |              |                |       |       | 0.003 | 0.301 |
| 9  | 01613 glycoside metabolic process         | 2/77 | 20/1<br>8493 | 09709          | 81585 | 60392 |       |       |
|    | 7                                         |      |              | 1              | 6     | 3     |       |       |
|    | GO:0                                      |      |              |                |       |       | 0.003 | 0.301 |
| 9  | 00689 receptor-mediated endocytosis       | 6/77 | 346/<br>1849 | 19301          | 81585 | 60392 |       |       |
|    | 8                                         |      | 3            | 9              | 6     | 3     |       |       |
|    | GO:0                                      |      |              |                |       |       | 0.003 | 0.301 |
| 9  | 03019 extracellular matrix organization   | 6/77 | 348/<br>1849 | 28470          | 81585 | 60392 |       |       |
|    | 8                                         |      | 3            | 8              | 6     | 3     |       |       |
|    | GO:0                                      |      |              |                |       |       | 0.003 | 0.301 |
| 9  | 00608 cellular aldehyde metabolic process | 3/77 | 73/1<br>8493 | 50185          | 81585 | 60392 |       |       |
|    | 1                                         |      |              | 2              | 6     | 3     |       |       |
|    | GO:0                                      |      |              |                |       |       | 0.003 | 0.318 |
| 9  | 03430 primary alcohol metabolic process   | 3/77 | 76/1<br>8493 | 92301          | 22544 | 02333 |       |       |
|    | 8                                         |      |              | 1              | 6     | 8     |       |       |
|    | GO:0                                      |      |              |                |       |       | 0.004 | 0.318 |
| 9  | 01403 neural crest cell development       | 3/77 | 78/1<br>8493 | 22019          | 79438 | 55794 |       |       |
|    | 2                                         |      |              | 3              | 6     | 7     |       |       |
|    | GO:0                                      |      |              |                |       |       | 0.004 | 0.318 |
| 9  | 01572 bile acid and bile salt transport   | 2/77 | 25/1<br>8493 | 82477          | 79438 | 55794 |       |       |
|    | 1                                         |      |              | 8              | 6     | 7     |       |       |
|    | GO:0                                      |      |              |                |       |       | 0.004 | 0.318 |
| 9  | 01403 mesenchymal cell development        | 3/77 | 82/1<br>8493 | 85473          | 79438 | 55794 |       |       |
|    | 1                                         |      |              | 7              | 6     | 7     |       |       |
|    | GO:0                                      |      |              |                |       |       | 5.49E | 1.05E |
| 10 | 00640 mRNA catabolic process              | 14/9 | 307/<br>1849 | 5.49E          | 1.05E | 7.93E |       |       |
|    | 2                                         | 5    | 3            | -10            | -06   | -07   |       |       |
|    | GO:0                                      |      |              |                |       |       | 2.06E | 1.97E |
| 10 | 00640 RNA catabolic process               | 14/9 | 340/<br>1849 | 2.06E          | 1.97E | 1.49E |       |       |
|    | 1                                         | 5    | 3            | -09            | -06   | -06   |       |       |
|    | GO:0                                      |      |              |                |       |       | 4.25E | 2.71E |
| 10 | 06024 anatomical structure homeostasis    | 15/9 | 425/<br>1849 | 4.25E          | 2.71E | 2.04E |       |       |
|    | 9                                         | 5    | 3            | -09            | -06   | -06   |       |       |

|          |                                                                        |      |      |       |       |       |
|----------|------------------------------------------------------------------------|------|------|-------|-------|-------|
| GO:0     |                                                                        | 13/9 | 317/ | 8.54E | 3.55E | 2.68E |
| 10 09015 | establishment of protein localization to membrane                      | 5    | 1849 | -09   | -06   | -06   |
| GO:0     |                                                                        |      | 120/ | 1.11E | 3.55E | 2.68E |
| 10 00018 | nuclear-transcribed mRNA catabolic process,<br>nonsense-mediated decay | 9/95 | 1849 | -08   | -06   | -06   |
| GO:0     |                                                                        |      | 265/ | 1.11E | 3.55E | 2.68E |
| 10 03164 | regulation of protein stability                                        | 12/9 | 1849 | -08   | -06   | -06   |
| GO:0     |                                                                        |      | 218/ | 1.56E | 3.85E | 2.90E |
| 10 00645 | protein folding                                                        | 11/9 | 1849 | -08   | -06   | -06   |
| GO:0     |                                                                        |      | 169/ | 1.61E | 3.85E | 2.90E |
| 10 05082 | protein stabilization                                                  | 10/9 | 1849 | -08   | -06   | -06   |
| GO:0     |                                                                        |      | 36/1 | 2.69E | 5.72E | 4.32E |
| 10 04584 | negative regulation of mitotic metaphase/anaphase transition           | 6/95 | 8493 | -08   | -06   | -06   |
| GO:1     |                                                                        |      | 37/1 | 3.20E | 6.12E | 4.62E |
| 10 90210 | negative regulation of metaphase/anaphase transition of cell<br>cycle  | 6/95 | 8493 | -08   | -06   | -06   |
| GO:0     |                                                                        |      | 185/ | 3.81E | 6.62E | 5.00E |
| 10 00081 | sister chromatid segregation                                           | 10/9 | 1849 | -08   | -06   | -06   |
| GO:2     |                                                                        |      | 39/1 | 4.46E | 7.10E | 5.36E |
| 10 00081 | negative regulation of mitotic sister chromatid separation             | 6/95 | 8493 | -08   | -06   | -06   |
| GO:1     |                                                                        |      | 40/1 | 5.22E | 7.41E | 5.59E |
| 10 90581 | negative regulation of chromosome separation                           | 6/95 | 8493 | -08   | -06   | -06   |
| GO:2     |                                                                        |      | 144/ | 5.45E | 7.41E | 5.59E |
| 10 00125 | negative regulation of chromosome organization                         | 9/95 | 1849 | -08   | -06   | -06   |
| GO:0     |                                                                        |      | 194/ | 5.97E | 7.41E | 5.59E |
| 10 00641 | translational initiation                                               | 10/9 | 1849 | -08   | -06   | -06   |
| GO:1     |                                                                        |      | 375/ | 6.20E | 7.41E | 5.59E |
| 10 90199 | regulation of mitotic cell cycle phase transition                      | 13/9 | 1849 | -08   | -06   | -06   |
| GO:0     |                                                                        |      | 105/ | 6.66E | 7.49E | 5.66E |
| 10 00661 | SRP-dependent cotranslational protein targeting to membrane            | 8/95 | 1849 | -08   | -06   | -06   |
| GO:0     |                                                                        |      | 42/1 | 7.08E | 7.52E | 5.67E |
| 10 03304 | negative regulation of mitotic sister chromatid segregation            | 6/95 | 8493 | -08   | -06   | -06   |
| GO:0     |                                                                        |      | 109/ | 8.93E | 8.98E | 6.78E |
| 10 00661 | cotranslational protein targeting to membrane                          | 8/95 | 1849 | -08   | -06   | -06   |
|          |                                                                        |      | 3    |       |       |       |



|      |       |                                                                                                 |       |          |          |          |          |
|------|-------|-------------------------------------------------------------------------------------------------|-------|----------|----------|----------|----------|
| GO:0 |       |                                                                                                 |       |          |          |          |          |
| 11   | 00695 | humoral immune response                                                                         | 12/90 | 349/1849 | 1.24E-07 | 1.44E-05 | 1.08E-05 |
| GO:0 |       |                                                                                                 |       |          |          |          |          |
| 11   | 00246 | immune receptors built from immunoglobulin superfamily domains                                  | 12/90 | 354/1849 | 1.44E-07 | 1.45E-05 | 1.09E-05 |
| GO:0 |       |                                                                                                 |       |          |          |          |          |
| 11   | 00191 | positive regulation of T cell mediated cytotoxicity                                             | 5/90  | 26/1849  | 1.48E-07 | 1.45E-05 | 1.09E-05 |
| GO:0 |       |                                                                                                 |       |          |          |          |          |
| 11   | 00247 | antigen processing and presentation of exogenous peptide antigen via MHC class I, TAP-dependent | 5/90  | 26/1849  | 1.48E-07 | 1.45E-05 | 1.09E-05 |
| GO:0 |       |                                                                                                 |       |          |          |          |          |
| 11   | 00269 | regulation of immune effector process                                                           | 13/90 | 439/1849 | 1.99E-07 | 1.85E-05 | 1.39E-05 |

---

**Supplementary table5** The top 20 enrichment terms of the exemplar genes in other 9 cluster by NMF.
