# Supplementary material for: Immune and stromal scoring system associated with tumor microenvironment and prognosis: a gene-based multi-cancer analysis
Source: Springer Nature journal article supplement (doi:10.1186/s12967-021-03002-1), 2021-08-03
Supplement: MOESM14 [file 19538084]

| <b>Gene ID</b> | <b>Category</b> |
|----------------|-----------------|
| CD40LG         | Immune-related  |
| THEMIS         | Immune-related  |
| PYHIN1         | Immune-related  |
| TRAT1          | Immune-related  |
| FCRL1          | Immune-related  |
| SPIB           | Immune-related  |
| GPR174         | Immune-related  |
| SH2D1A         | Immune-related  |
| CCR4           | Immune-related  |
| ITK            | Immune-related  |
| FCRL3          | Immune-related  |
| C5orf20        | Immune-related  |
| FIGF           | Immune-related  |
| UBASH3A        | Immune-related  |
| MS4A1          | Immune-related  |
| CD300LG        | Immune-related  |
| SAMD3          | Immune-related  |
| ADH1B          | Immune-related  |
| GZMK           | Immune-related  |
| CHRD1          | Immune-related  |
| ABI3BP         | Immune-related  |
| FCER2          | Immune-related  |
| TIFAB          | Immune-related  |
| P2RY12         | Immune-related  |
| CLEC10A        | Immune-related  |
| RSPO2          | Immune-related  |
| PCDH15         | Immune-related  |
| HLA-DOA        | Immune-related  |
| PLA2G2D        | Immune-related  |
| CLEC17A        | Immune-related  |
| CD3G           | Immune-related  |
| CCL19          | Immune-related  |
| PTPRC          | Immune-related  |
| C17orf87       | Immune-related  |
| GRIA1          | Immune-related  |
| CD8A           | Immune-related  |
| PRG4           | Immune-related  |
| P2RY13         | Immune-related  |
| SFTPC          | Immune-related  |
| HLA-DPB1       | Immune-related  |
| AADAC          | Immune-related  |
| EOMES          | Immune-related  |
| AOAH           | Immune-related  |
| CD1E           | Immune-related  |
| CCR2           | Immune-related  |
| CCL5           | Immune-related  |

|          |                |
|----------|----------------|
| GFRA1    | Immune-related |
| TFEC     | Immune-related |
| CLDN18   | Immune-related |
| FGL2     | Immune-related |
| C4orf7   | Immune-related |
| CD1B     | Immune-related |
| GZMA     | Immune-related |
| HLA-DPA1 | Immune-related |
| SCARA5   | Immune-related |
| PLEK     | Immune-related |
| ZNF683   | Immune-related |
| CD19     | Immune-related |
| HLA-DRA  | Immune-related |
| CD84     | Immune-related |
| PIK3CG   | Immune-related |
| NCKAP1L  | Immune-related |
| CR1      | Immune-related |
| WIF1     | Immune-related |
| CLEC12A  | Immune-related |
| KIAA0408 | Immune-related |
| PIGR     | Immune-related |
| CXCL13   | Immune-related |
| CD74     | Immune-related |
| TLR8     | Immune-related |
| CHIT1    | Immune-related |
| IL7R     | Immune-related |
| HLA-DRB1 | Immune-related |
| HLA-DQA1 | Immune-related |
| COL6A6   | Immune-related |
| LYZ      | Immune-related |
| SFTPA2   | Immune-related |
| CYBB     | Immune-related |
| COL29A1  | Immune-related |
| LCP1     | Immune-related |
| IGJ      | Immune-related |
| UBD      | Immune-related |
| HLA-DQA2 | Immune-related |
| CXCL9    | Immune-related |
| PPYR1    | Immune-related |
| IFNG     | Immune-related |
| MRC1     | Immune-related |
| FAM26F   | Immune-related |
| B2M      | Immune-related |
| CD1A     | Immune-related |
| HLA-B    | Immune-related |
| GBP5     | Immune-related |
| ADAMDEC1 | Immune-related |

|          |                 |
|----------|-----------------|
| LAPTM5   | Immune-related  |
| C1QB     | Immune-related  |
| ITGB2    | Immune-related  |
| C1QA     | Immune-related  |
| SUCNR1   | Immune-related  |
| MARCO    | Immune-related  |
| HLA-C    | Immune-related  |
| VSIG4    | Immune-related  |
| F13A1    | Immune-related  |
| CXCL10   | Immune-related  |
| C1QC     | Immune-related  |
| HLA-A    | Immune-related  |
| CD163    | Immune-related  |
| FCGR3A   | Immune-related  |
| TMSL3    | Immune-related  |
| MDK      | Stromal-related |
| RPL8     | Stromal-related |
| S100P    | Stromal-related |
| FTH1     | Stromal-related |
| GPR87    | Stromal-related |
| UBC      | Stromal-related |
| CLDN3    | Stromal-related |
| FGL1     | Stromal-related |
| TMSB10   | Stromal-related |
| HSPB1    | Stromal-related |
| ACTB     | Stromal-related |
| ITPKA    | Stromal-related |
| KRT19    | Stromal-related |
| S100A2   | Stromal-related |
| EEF1A2   | Stromal-related |
| PABPC1   | Stromal-related |
| RPLP0    | Stromal-related |
| HSP90AB1 | Stromal-related |
| NMU      | Stromal-related |
| KRT8     | Stromal-related |
| KRT7     | Stromal-related |
| EPCAM    | Stromal-related |
| YWHAZ    | Stromal-related |
| MYH9     | Stromal-related |
| ACTG1    | Stromal-related |
| NPW      | Stromal-related |
| MMP13    | Stromal-related |
| TUBA1B   | Stromal-related |
| ERRFI1   | Stromal-related |
| DSP      | Stromal-related |
| KRT18    | Stromal-related |
| P4HB     | Stromal-related |

|         |                 |
|---------|-----------------|
| ENO1    | Stromal-related |
| PKM2    | Stromal-related |
| RHOV    | Stromal-related |
| ALDOA   | Stromal-related |
| JUP     | Stromal-related |
| LDHA    | Stromal-related |
| HMGA1   | Stromal-related |
| HSPA1A  | Stromal-related |
| MIF     | Stromal-related |
| TUBB    | Stromal-related |
| HMGB3   | Stromal-related |
| CYP24A1 | Stromal-related |
| TPI1    | Stromal-related |
| FAM83A  | Stromal-related |
| RECQL4  | Stromal-related |
| FN1     | Stromal-related |
| VEGFA   | Stromal-related |
| GAPDH   | Stromal-related |
| TK1     | Stromal-related |
| TUBB3   | Stromal-related |
| UBE2C   | Stromal-related |
| MYBL2   | Stromal-related |
| COL3A1  | Stromal-related |
| COL1A1  | Stromal-related |
| COL1A2  | Stromal-related |
| COL11A1 | Stromal-related |

---

**Supplementary table6** Immune and stromal gene signatures.
