# Supplementary material for: Immune and stromal scoring system associated with tumor microenvironment and prognosis: a gene-based multi-cancer analysis
Source: Springer Nature journal article supplement (doi:10.1186/s12967-021-03002-1), 2021-08-03
Supplement: MOESM15 [file 19538084]

| Our signature | Other signatures                                                                                                                               | Number of overlaps | Overlap genes                                                                                                                                   | Study title                                                                                                                            | PMID         |
|---------------|------------------------------------------------------------------------------------------------------------------------------------------------|--------------------|-------------------------------------------------------------------------------------------------------------------------------------------------|----------------------------------------------------------------------------------------------------------------------------------------|--------------|
| Stromal       | Hypoxia-related signatures                                                                                                                     | 9<br>(15.5%)       | MIF, LDHA, VEGFA, TPI1, ALDOA, P4HB, GAPDH, ACTB, ACTG1                                                                                         | MALDI-Mass Spectrometric Imaging Revealing Hypoxia-Driven Lipids and Proteins in a Breast Tumor Model                                  | 2599<br>3305 |
| Stromal       | Differential expression genes in Hep-2 cells induced by fibroblast conditioned medium and fibroblasts induced by Hep-2 cell conditioned medium | 9<br>(15.5%)       | ENO1, YWHAZ, ACTB, ACTG1, GAPDH, RPLP0, FN1, COL1A1, P4HB                                                                                       | Genomics and Proteomics Approaches to the Study of Cancer-Stroma Interactions                                                          | 2044<br>1585 |
| Stromal       | Collagen fibril organizing genes                                                                                                               | 7<br>(12.1%)       | COL3A1, COL1A2, COL1A1, FN1, ACTB, ACTG1, GAPDH                                                                                                 | A Subset of Myofibroblastic Cancer-Associated Fibroblasts Regulate Collagen Fiber Elongation, Which Is Prognostic in Multiple Cancers  | 2671<br>6418 |
| Immune        | Immune gene signatures                                                                                                                         | 20<br>(18.5%)      | CD84, CD74, TRAT1, CD19, CD163, CYBB, CCL5, CXCL9, GZMA, GZMK, CD3G, IGJ, FCGR3A, HLA-B, HLA-C, HLA-DPB1, HLA-DPA1, HLA-DRB1, HLA-DQA1, HLA-DRA | Conservation of Immune Gene Signatures in Solid Tumors and Prognostic Implications                                                     | 2787<br>1313 |
| Immune        | Immune score signatures                                                                                                                        | 15<br>(13.9%)      | HLA-DOA, HLA-DQA2, HLA-DPB1, HLA-A, HLA-B, HLA-C, HLA-DPA1, HLA-DRB1, HLA-DRA, PTPRC, IFNG, GZMA, CCL5, CXCL10, CXCL9                           | Genomic and Immune Heterogeneity Are Associated With Differential Responses to Therapy in Melanoma                                     | 2881<br>9565 |
| Immune        | Genes are associated with immune cytolytic activity                                                                                            | 11<br>(10.2%)      | C1QC, C1QB, CXCL10, CXCL13, CXCL9, UBD, PLA2G2D, B2M, HLA-A, GZMK, GZMA                                                                         | The Expression and Prognostic Impact of Immune Cytolytic Activity-Related Markers in Human Malignancies: A Comprehensive Meta-analysis | 2951<br>5971 |

**Supplementary table7** Gene overlap between our gene signatures and existing signatures.
