# Supplementary material for: Immune and stromal scoring system associated with tumor microenvironment and prognosis: a gene-based multi-cancer analysis
Source: Springer Nature journal article supplement (doi:10.1186/s12967-021-03002-1), 2021-08-03
Supplement: MOESM16 [file 19538084]

| Data set             | Term                 | ISTMEscore            |                       | ESTIMATE              |                       |                           |                       | MPCCounter            |                                  |                       |                       |                                  |                                       |                       |                              |                       |
|----------------------|----------------------|-----------------------|-----------------------|-----------------------|-----------------------|---------------------------|-----------------------|-----------------------|----------------------------------|-----------------------|-----------------------|----------------------------------|---------------------------------------|-----------------------|------------------------------|-----------------------|
|                      |                      | immu<br>ne<br>score   | strom<br>al<br>score  | imm<br>une<br>score   | stro<br>mal<br>score  | ESTI<br>MAT<br>E<br>score | Tcell                 | CD8<br>+Tce<br>ll     | Cytoto<br>xic<br>lymph<br>ocytes | NKce<br>ll            | B<br>linea<br>ge      | Mon<br>ocyti<br>c<br>linea<br>ge | Myeloi<br>d<br>dendri<br>tic<br>cells | Neut<br>rophi<br>ls   | Endo<br>theli<br>al<br>cells | Fibro<br>blast<br>s   |
| TCG<br>A<br>LUA<br>D | C-index<br>(se)      | 0.578<br>(se = 0.022) | 0.624<br>(se = 0.024) | 0.578<br>(se = 0.023) | 0.541<br>(se = 0.024) | 0.568<br>(se = 0.023)     | 0.595<br>(se = 0.023) | 0.549<br>(se = 0.024) | 0.512<br>(se = 0.025)            | 0.533<br>(se = 0.026) | 0.598<br>(se = 0.024) | 0.508<br>(se = 0.025)            | 0.594<br>(se = 0.023)                 | 0.538<br>(se = 0.025) | 0.53<br>(se = 0.024)         | 0.535<br>(se = 0.024) |
|                      |                      | Rank of<br>C-index    | 5                     | 1                     | 5                     | 9                         | 7                     | 3                     | 8                                | 14                    | 12                    | 2                                | 15                                    | 4                     | 10                           | 13                    |
|                      | TCG<br>A<br>SKC<br>M | C-index<br>(se)       | 0.61<br>(se = 0.024)  | 0.578<br>(se = 0.023) | 0.601<br>(se = 0.024) | 0.544<br>(se = 0.024)     | 0.585<br>(se = 0.024) | 0.572<br>(se = 0.024) | 0.611<br>(se = 0.024)            | 0.59<br>(se = 0.023)  | 0.62<br>(se = 0.023)  | 0.556<br>(se = 0.024)            | 0.592<br>(se = 0.025)                 | 0.602<br>(se = 0.023) | 0.568<br>(se = 0.023)        | 0.527<br>(se = 0.024) |
| Rank of<br>C-index   | 3                    |                       | 9                     | 5                     | 13                    | 8                         | 10                    | 2                     | 7                                | 1                     | 12                    | 6                                | 4                                     | 11                    | 15                           | 14                    |
| TCA<br>G<br>HNS<br>C | C-index<br>(se)      | 0.542<br>(se = 0.021) | 0.542<br>(se = 0.022) | 0.542<br>(se = 0.021) | 0.504<br>(se = 0.022) | 0.528<br>(se = 0.022)     | 0.591<br>(se = 0.021) | 0.551<br>(se = 0.021) | 0.558<br>(se = 0.02)             | 0.555<br>(se = 0.022) | 0.598<br>(se = 0.021) | 0.502<br>(se = 0.022)            | 0.553<br>(se = 0.021)                 | 0.521<br>(se = 0.023) | 0.521<br>(se = 0.022)        | 0.517<br>(se = 0.022) |
|                      |                      | Rank of<br>C-index    | 7                     | 7                     | 7                     | 14                        | 10                    | 2                     | 6                                | 3                     | 4                     | 1                                | 15                                    | 5                     | 11                           | 11                    |
|                      | GSE<br>1196<br>9     | C-index<br>(se)       | 0.594<br>(se = 0.033) | 0.613<br>(se = 0.033) | 0.573<br>(se = 0.035) | 0.545<br>(se = 0.035)     | 0.565<br>(se = 0.034) | 0.561<br>(se = 0.034) | NA                               | 0.561<br>(se = 0.034) | 0.538<br>(se = 0.035) | 0.574<br>(se = 0.035)            | 0.505<br>(se = 0.037)                 | 0.56<br>(se = 0.033)  | 0.562<br>(se = 0.033)        | 0.57<br>(se = 0.034)  |
| Rank of<br>C-index   |                      |                       | 2                     | 1                     | 4                     | 11                        | 6                     | 8                     |                                  | 8                     | 12                    | 3                                | 14                                    | 10                    | 7                            | 5                     |
| GSE<br>6846<br>5     | C-index<br>(se)      | 0.532<br>(se = 0.021) | 0.578<br>(se = 0.019) | 0.522<br>(se = 0.021) | 0.524<br>(se = 0.021) | 0.524<br>(se = 0.021)     | 0.528<br>(se = 0.021) | 0.518<br>(se = 0.021) | 0.561<br>(se = 0.02)             | 0.55<br>(se = 0.02)   | 0.543<br>(se = 0.02)  | 0.564<br>(se = 0.021)            | 0.538<br>(se = 0.021)                 | 0.51<br>(se = 0.021)  | 0.506<br>(se = 0.021)        | 0.518<br>(se = 0.02)  |
|                      |                      | Rank of<br>C-index    | 7                     | 1                     | 11                    | 9                         | 9                     | 8                     | 12                               | 3                     | 4                     | 5                                | 2                                     | 6                     | 14                           | 15                    |
|                      | GSE<br>6857<br>1     | C-index<br>(se)       | 0.69<br>(se = 0.055)  | 0.667<br>(se = 0.059) | 0.642<br>(se = 0.055) | 0.599<br>(se = 0.058)     | 0.625<br>(se = 0.058) | 0.539<br>(se = 0.07)  | 0.545<br>(se = 0.07)             | 0.506<br>(se = 0.068) | 0.502<br>(se = 0.07)  | 0.577<br>(se = 0.071)            | 0.613<br>(se = 0.068)                 | 0.523<br>(se = 0.072) | 0.532<br>(se = 0.068)        | 0.501<br>(se = 0.066) |
| Rank of<br>C-index   |                      |                       | 1                     | 2                     | 3                     | 6                         | 4                     | 9                     | 8                                | 13                    | 14                    | 7                                | 5                                     | 11                    | 10                           | 15                    |
| GSE<br>3774<br>5     | C-index<br>(se)      | 0.531<br>(se = 0.027) | 0.505<br>(se = 0.026) | 0.511<br>(se = 0.027) | 0.52<br>(se = 0.027)  | 0.513<br>(se = 0.028)     | 0.543<br>(se = 0.026) | 0.561<br>(se = 0.027) | 0.505<br>(se = 0.026)            | 0.536<br>(se = 0.026) | 0.573<br>(se = 0.027) | 0.53<br>(se = 0.026)             | 0.561<br>(se = 0.025)                 | 0.524<br>(se = 0.024) | 0.534<br>(se = 0.026)        | 0.505<br>(se = 0.025) |
|                      |                      | Rank of<br>C-index    | 7                     | 13                    | 12                    | 10                        | 11                    | 4                     | 2                                | 13                    | 5                     | 1                                | 8                                     | 2                     | 9                            | 6                     |
|                      | GSE<br>5008          | C-index<br>(se)       | 0.535<br>(se = 0.027) | 0.645<br>(se = 0.026) | 0.509<br>(se = 0.027) | 0.508<br>(se = 0.027)     | 0.512<br>(se = 0.028) | 0.516<br>(se = 0.026) | 0.541<br>(se = 0.027)            | 0.514<br>(se = 0.026) | 0.532<br>(se = 0.026) | 0.561<br>(se = 0.027)            | 0.553<br>(se = 0.026)                 | 0.567<br>(se = 0.025) | 0.523<br>(se = 0.024)        | 0.577<br>(se = 0.026) |

|                                                 |                            |                    |                    |                    |                    |                    |                    |                    |                   |                    |                    |                    |                       |                    |                     |                     |       |       |
|-------------------------------------------------|----------------------------|--------------------|--------------------|--------------------|--------------------|--------------------|--------------------|--------------------|-------------------|--------------------|--------------------|--------------------|-----------------------|--------------------|---------------------|---------------------|-------|-------|
|                                                 |                            | 0.038              | 0.033              | 0.039              | 0.036              | 0.039              | 0.037              | 0.036              | 0.035             | )                  | 0.036              | 0.038              | 0.038                 | 0.035              | )                   | 0.037               | 0.036 | 0.037 |
|                                                 |                            | )                  | )                  | )                  | )                  | )                  | )                  | )                  | )                 | )                  | )                  | )                  | )                     | )                  | )                   | )                   | )     | )     |
|                                                 | Rank of C-index            | 8                  | 1                  | 14                 | 15                 | 13                 | 11                 | 7                  | 12                | 9                  | 4                  | 5                  | 3                     | 10                 | 2                   | 6                   |       |       |
| <b>GSE 6590 4</b>                               | C-index (se)               | 0.612 (se = 0.031) | 0.532 (se = 0.03)  | 0.614 (se = 0.03)  | 0.506 (se = 0.034) | 0.561 (se = 0.032) | 0.6 (se = 0.032)   | 0.578 (se = 0.028) | 0.598 (se = 0.03) | 0.611 (se = 0.029) | 0.622 (se = 0.029) | 0.559 (se = 0.035) | 0.603 (se = 0.03)     | 0.54 (se = 0.031)  | 0.548 (se = 0.031)  | 0.553 (se = 0.032)  |       |       |
|                                                 | Rank of C-index            | 3                  | 14                 | 2                  | 15                 | 9                  | 6                  | 8                  | 7                 | 4                  | 1                  | 10                 | 5                     | 13                 | 12                  | 11                  |       |       |
| <b>Prog nosi s</b>                              | Mean C-index               | 0.580 (se = 0.031) | 0.587 (se = 0.031) | 0.565 (se = 0.031) | 0.532 (se = 0.033) | 0.553 (se = 0.044) | 0.560 (se = 0.055) | 0.556 (se = 0.075) | 0.545             | 0.553              | 0.578              | 0.547 (se = 0.033) | 0.5667 (se = 0.07778) | 0.535 (se = 0.033) | 0.534 (se = 0.0888) | 0.527 (se = 0.0666) |       |       |
|                                                 | Rank of mean C-index       | 4                  | 1                  | 78                 | 33                 | 44                 | 56                 | 75                 | 11                | 9                  | 3                  | 10                 | 4                     | 13                 | 12                  | 15                  |       |       |
| <b>Imm unot hera py Data Set 1</b>              | Response pre-treatment AUC | 0.546 (se = 0.009) | 0.558 (se = 0.006) | 0.546 (se = 0.009) | 0.640 (se = 0.006) | 0.570 (se = 0.003) | 0.531 (se = 0.002) | 0.476 (se = 0.006) | 0.5391            | 0.494              | 0.511              | 0.503              | 0.707                 | 0.570 (se = 0.003) | 0.605 (se = 0.005)  |                     |       |       |
|                                                 | Response on-treatment AUC  | 0.981 (se = 0.005) | 0.907 (se = 0.004) | 0.981 (se = 0.005) | 0.963 (se = 0.001) | 0.963 (se = 0.001) | 0.944 (se = 0.004) | 0.963              | 0.666             | 0.888              | 0.8704             | 0.703 (se = 0.007) | 0.907 (se = 0.004)    | NA                 |                     |                     |       |       |
|                                                 | Rank of on-treatment AUC   | 3                  | 9                  | 3                  | 5                  | 1                  | 5                  | 8                  | 5                 | 14                 | 11                 | 1                  | 12                    | 13                 | 9                   |                     |       |       |
| <b>Imm unot hera py Data Set 2 (GS E91 061)</b> | Response pre-treatment AUC | 0.602              | 0.526 (se = 0.008) | 0.546 (se = 0.008) | 0.538 (se = 0.005) | 0.571 (se = 0.009) | 0.655 (se = 0.005) | 0.571 (se = 0.001) | 0.5167            | 0.469              | 0.541              | 0.496              | 0.5585                | 0.543 (se = 0.005) | 0.617 (se = 0.001)  | 0.538 (se = 0.005)  |       |       |
|                                                 | Response on-treatment AUC  | 0.700 (se = 0.006) | 0.589 (se = 0.007) | 0.691 (se = 0.006) | 0.656 (se = 0.008) | 0.696 (se = 0.008) | 0.757 (se = 0.004) | 0.683 (se = 0.009) | 0.6968            | 0.663              | 0.754              | 0.668              | 0.7239                | 0.579 (se = 0.004) | 0.587 (se = 0.001)  | 0.578 (se = 0.001)  |       |       |
|                                                 | Rank of on-treatment AUC   | 4                  | 12                 | 7                  | 11                 | 5                  | 2                  | 8                  | 5                 | 10                 | 1                  | 9                  | 3                     | 14                 | 13                  | 15                  |       |       |
| <b>Imm unot hera py Data</b>                    | Response pre-treatment AUC | 0.543 (se = 0.003) | 0.746 (se = 0.007) | 0.563 (se = 0.003) | 0.553 (se = 0.003) | 0.53 (se = 0.005)  | 0.593 (se = 0.003) | 0.596 (se = 0.007) | 0.7467            | 0.576              | 0.526              | 0.54               | 0.57                  | 0.593 (se = 0.003) | 0.656 (se = 0.007)  | 0.523 (se = 0.003)  |       |       |

|                                    |                            |         |         |         |         |        |         |         |        |         |        |         |         |         |         |        |  |
|------------------------------------|----------------------------|---------|---------|---------|---------|--------|---------|---------|--------|---------|--------|---------|---------|---------|---------|--------|--|
| <b>Set 3</b>                       |                            |         |         |         |         |        |         |         |        |         |        |         |         |         |         |        |  |
| <b>(GS E93 157)</b>                | Rank of AUC                | 11      | 1       | 9       | 10      | 13     | 5       | 4       | 1      | 7       | 15     | 12      | 8       | 5       | 3       | 14     |  |
| <b>Imm unot hera py Data Set 4</b> | Response pre-treatment AUC | 0.75    | 0.75    | 0.537   | 0.6071  | 0.5    | 0.5714  | 0.6429  | 0.6429 | 0.6071  | 0.5714 | 0.6786  | 0.8214  | 0.6786  | 0.6071  | 0.6786 |  |
| <b>(GS E67 501)</b>                | Rank of AUC                | 2       | 2       | 14      | 9       | 15     | 12      | 7       | 7      | 9       | 12     | 4       | 1       | 4       | 9       | 4      |  |
| <b>Imm unot hera py Data Set 5</b> | Response pre-treatment AUC | 0.6564  | 0.5989  | 0.635   | 0.6457  | 0.6337 | 0.7166  | 0.5388  | 0.5281 | 0.6925  | 0.5922 | 0.7861  | 0.643   | 0.5227  | 0.516   | 0.512  |  |
| <b>(GS E35 640)</b>                | Rank of AUC                | 4       | 9       | 7       | 5       | 8      | 2       | 11      | 12     | 3       | 10     | 1       | 6       | 13      | 14      | 15     |  |
| <b>Imm unot hera py resps e</b>    | Mean AUC                   | 0.72636 | 0.71854 | 0.68142 | 0.68518 | 0.6721 | 0.72034 | 0.68134 | 0.7155 | 0.64124 | 0.6668 | 0.73462 | 0.72574 | 0.61554 | 0.65486 | 0.573  |  |
|                                    | Rank of mean AUC           | 2       | 5       | 8       | 7       | 10     | 4       | 9       | 6      | 13      | 11     | 1       | 3       | 14      | 12      | 15     |  |

**Supplementary table8** Comparison with ESTIMATE and MCPcounter algorithms for prognosis and immunotherapy response prediction.
