# Supplementary material for: Immune and stromal scoring system associated with tumor microenvironment and prognosis: a gene-based multi-cancer analysis
Source: Springer Nature journal article supplement (doi:10.1186/s12967-021-03002-1), 2021-08-03
Supplement: MOESM17 [file 19538084]

| Acronym                                                                                    | Full name                                      |
|--------------------------------------------------------------------------------------------|------------------------------------------------|
| TCGA                                                                                       | The Cancer Genome Atlas                        |
| GEO                                                                                        | Gene Expression Omnibus                        |
| LUAD                                                                                       | lung adenocarcinoma                            |
| SKCM                                                                                       | skin cutaneous melanoma                        |
| HNSC                                                                                       | head and neck squamous cell carcinoma          |
| TME                                                                                        | tumor microenvironment                         |
| RMA                                                                                        | robust multi-array average                     |
| SD                                                                                         | stable disease                                 |
| RNA-seq                                                                                    | RNA-sequencing                                 |
| RECIST                                                                                     | Response Evaluation Criteria in Solid Tumors   |
| TMB                                                                                        | Tumor mutation burden                          |
| CNA                                                                                        | Copy number alteration                         |
| NMF                                                                                        | Non-negative matrix factorization              |
| MTL                                                                                        | Multitask learning                             |
| DGE                                                                                        | different gene expression analysis             |
| GSEA                                                                                       | Gene set enrichment analysis                   |
| ssGSEA                                                                                     | Single-sample gene set enrichment analysis     |
| CRLCN                                                                                      | Cells-receptors-ligands communication networks |
| MOCDE                                                                                      | Molecular Complex Detection                    |
| ESTIMATE Estimation of STromal and Immune cells in MAlignant Tumours using Expression data |                                                |
| PSM                                                                                        | propensity score matching                      |
| ORA                                                                                        | over-representation analysis                   |
| GO                                                                                         | Gene Ontology                                  |
| ROC                                                                                        | receiver operating characteristic              |
| FDR                                                                                        | false discovery rate                           |
| LDF                                                                                        | low dimensional features                       |
| CNACB                                                                                      | CNA count burden                               |

**Supplementary table9** Table of acronyms.
